# Supplementary material for: Aerosol hygroscopicity over the South-East Atlantic Ocean during the biomass burning season: Part I – From the perspective of scattering enhancement
Source: Copernicus journal article supplement (doi:10.5194/egusphere-2023-2199), 2023-10-12
Supplement: Supplementary file 1 [file egusphere-2023-2199-supplement.pdf]

1 **Aerosol hygroscopicity over the South-East Atlantic Ocean during the biomass**  
2 **burning season: Part I – From the perspective of scattering enhancement**

3 **Lu Zhang<sup>1,2</sup>, Michal Segal-Rozenhaimer<sup>1,3,4\*</sup>, Haochi Che<sup>2\*</sup>, Caroline Dang<sup>3,4</sup>, Junying**  
4 **Sun<sup>5</sup>, Ye Kuang<sup>6,7</sup>, Paola Formenti<sup>8</sup>, Steven G. Howell<sup>9</sup>**

5 <sup>1</sup>Department of Geophysics, Porter School of the Environment and Earth Sciences, Tel Aviv  
6 University, Tel Aviv, Israel

7 <sup>2</sup>Department of Geosciences, University of Oslo, Oslo, Norway

8 <sup>3</sup>Bay Area Environmental Research Institute, Moffett Field, California, USA

9 <sup>4</sup>NASA Ames Research Center, Moffett Field, California, USA

10 <sup>5</sup>State Key Laboratory of Severe Weather & Key Laboratory of Atmospheric Chemistry, Chinese  
11 Academy of Meteorological Sciences, Beijing, China

12 <sup>6</sup>Institute for Environmental and Climate Research, Jinan University, Guangzhou, China

13 <sup>7</sup>Guangdong-Hongkong-Macau Joint Laboratory of Collaborative Innovation for Environmental  
14 Quality, Guangzhou, China

15 <sup>8</sup>Université Paris Cité and Univ Paris Est Creteil, CNRS, LISA, Paris, France

16 <sup>9</sup>Department of Oceanography, University of Hawai'i at Mānoa, Honolulu, USA

17 Correspondence: Michal Segal-Rozenhaimer (msegalro@tauex.tau.ac.il) and Haochi Che  
18 (haochi.che@geo.uio.no)

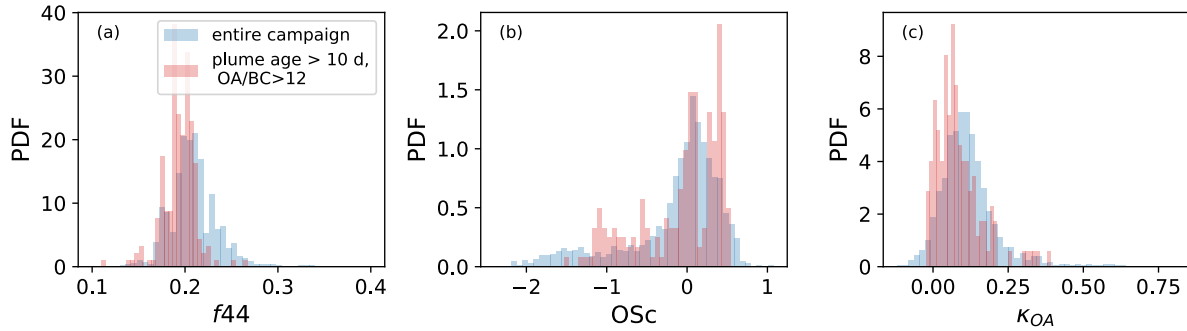

19

20 Figure S1. PDF of  $f_{44}$ ,  $OSc$ , and  $\kappa_{OA}$  for the entire 2016 and 2018 ORACLES campaign and for  
 21 aerosols with plume age  $> 10$  days and  $OA/BC > 12$ .

22

### 23 S1. Sensitivity of $f(RH)$ to PNSD

24 The  $\gamma(Fo, \kappa_{OA}, BC_r)$  parameterization was obtained assuming mean PNSD with the  
 25 geometric mean diameter  $D_{gn}=150$  nm and standard deviation  $\sigma_{sg}=1.6$ . To evaluate the sensitivity  
 26 of  $f(RH)$  to PNSD and explore its applicability to broader regions, we calculated the  $\gamma$  with various  
 27  $D_{gn}$  and  $\sigma_{sg}$  and compared it to those with the mean PNSD. Results are shown in Fig. S2 taking  
 28 measurements in ORACLES 2018 as an example. The deviations of  $\gamma$  calculated with  $D_{gn}$  and  $\sigma_{sg}$   
 29 in their interquartile ranges and the 10<sup>th</sup> - 90<sup>th</sup> percentile ranges are both smaller than 2% and 3%,  
 30 respectively, indicating a minor influence of PNSD to  $\gamma(Fo, \kappa_{OA}, BC_r)$  parameterization and  
 31 supporting the application of  $\gamma(Fo, \kappa_{OA}, BC_r)$  parameterization to ORACLES 2018. For a broader  
 32 aerosol population, the deviation is found to be less than 5% when  $D_{gn}$  varies from 75 nm to 210  
 33 nm (approx. -50% to 35% deviated from the mean  $D_{gn}$ ) and smaller than 10% with  $\sigma_{sg}$  varying  
 34 from 1.25 to 1.9 (approx.  $\pm 20\%$  deviated from the mean  $\sigma_{sg}$ ). The broad ranges of  $D_{gn}$  and  $\sigma_{sg}$   
 35 suggest that the  $\gamma(Fo, \kappa_{OA}, BC_r)$  parameterization can be applied to broader aerosol populations  
 36 (Hussein et al., 2004; Shen et al., 2015). Cautions are needed when Aitken mode aerosols are

37 dominant such as new particle formation events, as the deviation of  $\gamma$  increases sharply for  $D_{gn}$   
 38 smaller than 75 nm or  $\sigma_{sg}$  less than 1.25 (Fig. S1). We believe this parameterization would benefit  
 39 investigations of aerosol direct radiative forcing, aerosol liquid water content, comparison and  
 40 evaluation of remote sensing and in situ measurements, and visibility degradation.

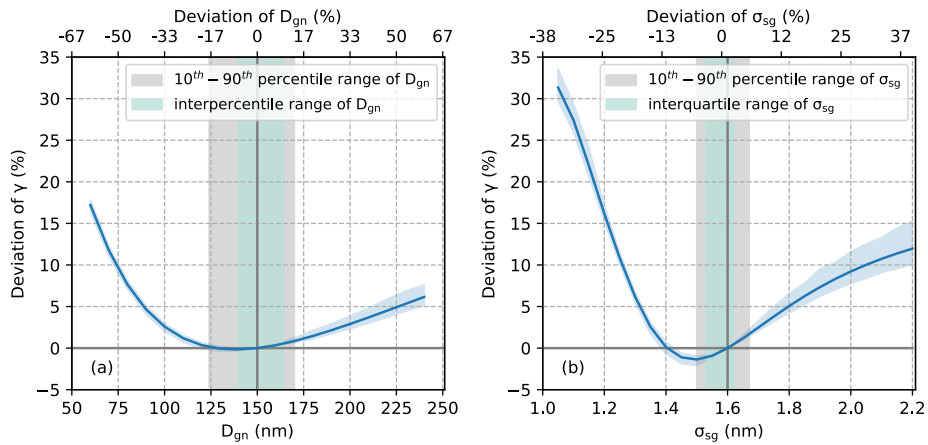

41  
 42 Figure S2. The sensitivity of  $\gamma$  to PNSD. (a) Deviation of  $\gamma$  predicted with various geometric mean  
 43 diameters  $D_{gn}$  to that with the mean  $D_{gn}$  in ORACLES 2018 and (b) deviation of  $\gamma$  predicted with  
 44 various standard deviation  $\sigma_{sg}$  to that with the mean  $\sigma_{sg}$  in ORACLES 2018. Blue lines represent  
 45 the mean value, and the blue shaded areas represent the 99.7% confidence interval (mean $\pm$ 3  
 46 standard deviation). The green and grey shaded areas represent the 25<sup>th</sup> to 75<sup>th</sup> percentile and the  
 47 10<sup>th</sup> to 90<sup>th</sup> percentile of  $D_{gn}$  or  $\sigma_{sg}$ , respectively, in ORACLES 2018. The upper x-axis shows the  
 48 deviation of  $D_{gn}$  or  $\sigma_{sg}$  to its mean values in ORACLES 2018.

49

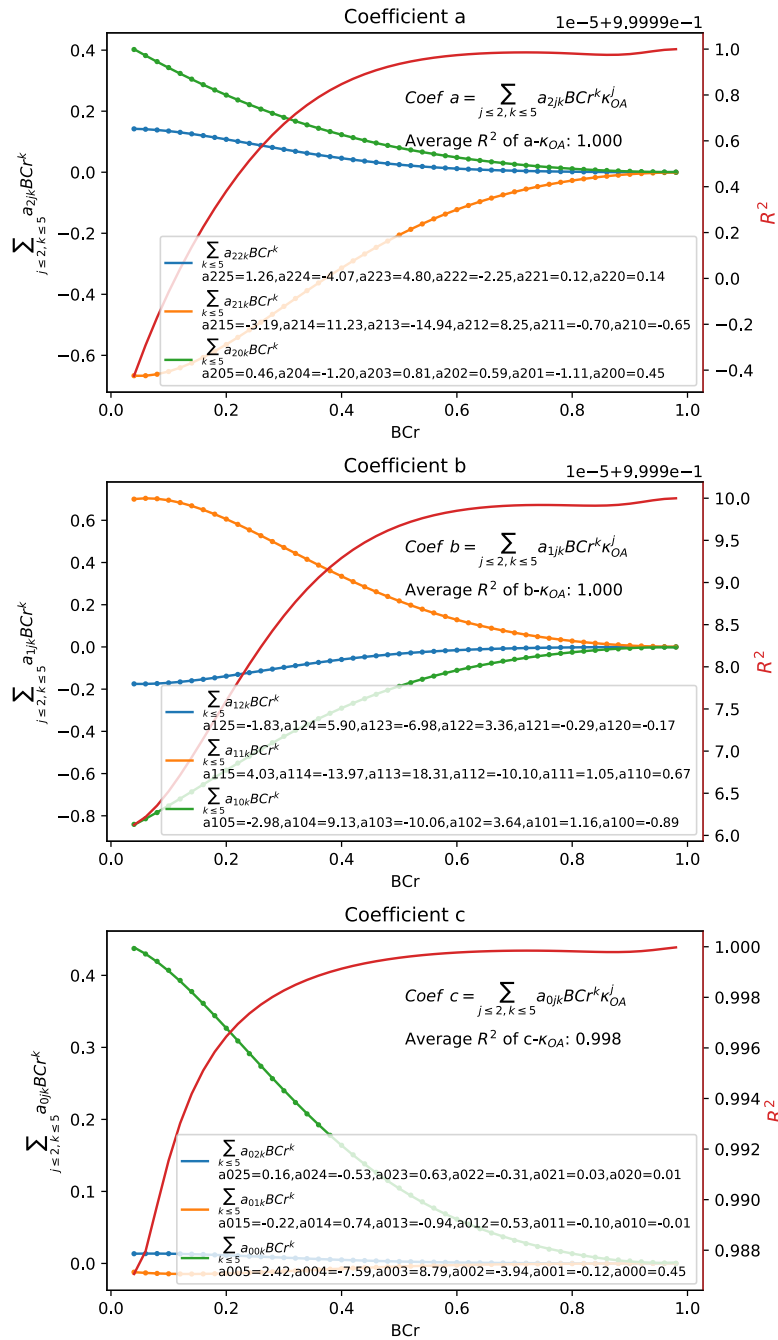

50

51 Figure S3. Coefficients a, b, and c of the second-order polynomial fit  $M(Fo, \kappa_{OA}, BCr) =$

52  $aFo^2 + bFo + c$ . The a, b, and c can be further fitted into a second-order polynomial fit of  $\kappa_{OA}$  with

53 coefficients being  $\sum_{j=2, k=5} a_{2jk} BCr^k$ ,  $\sum_{j=2, k=5} a_{1jk} BCr^k$ , and  $\sum_{j=2, k=5} a_{0jk} BCr^k$ , respectively. Red lines

54 represent the correlation coefficient  $R^2$  of the quadratic relationship between a, b, and c with  $\kappa_{OA}$

55 under each BCr, average values are shown in the texts. These coefficients are fitted into a fifth-  
 56 order polynomial equation with BCr with coefficients shown in each legend.

57

58 Table S1. Density ( $\rho$ ), refractive index ( $m=n+ik$ ) at 540 nm, and hygroscopicity parameter ( $\kappa$ ) of  
 59 inorganics, OA, and BC used in this study.

|                    | (NH <sub>4</sub> ) <sub>2</sub> SO <sub>4</sub> | NH <sub>4</sub> HSO <sub>4</sub> | NH <sub>4</sub> NO <sub>3</sub> | KCl               | OA               | BC                |
|--------------------|-------------------------------------------------|----------------------------------|---------------------------------|-------------------|------------------|-------------------|
|                    |                                                 |                                  |                                 |                   |                  | 1.8(Bond and      |
|                    |                                                 |                                  |                                 | 1.98(Kuan         | 1.4(Alfarr       | Bergstrom,        |
| $\rho$ (g          | 1.77(Lide,                                      | 1.78(Lide,                       | 1.72(Lide,                      | g et al.,         | a et al.,        | 2006; Liu et al., |
| cm <sup>-3</sup> ) | 2008)                                           | 2008)                            | 2008)                           | 2021)             | 2006)            | 2017)             |
|                    |                                                 |                                  |                                 |                   |                  | 1.95+0.79i(Bon    |
|                    |                                                 |                                  |                                 |                   |                  | d and             |
|                    |                                                 |                                  |                                 |                   | 1.65(Feng        | Bergstrom,        |
| $m=n+i$            |                                                 |                                  |                                 |                   | et al.,          | 2006; Liu et al., |
| $k$                | 1.45 <sup>a</sup>                               | 1.44 <sup>a</sup>                | 1.56 <sup>a</sup>               | 1.46 <sup>a</sup> | 2013)            | 2021)             |
|                    | 0.47(Toppin                                     |                                  | 0.58(Toppin                     |                   |                  |                   |
|                    | g et al.,                                       |                                  | g et al.,                       |                   |                  | 0(Kuang et al.,   |
|                    | 2005; Gysel                                     |                                  | 2005; Gysel                     |                   |                  | 2021; Topping     |
|                    | et al., 2007;                                   | 0.56(Kuan                        | et al., 2007;                   | 0.89(Kuan         |                  | et al., 2005;     |
|                    | Kim et al.,                                     | g et al.,                        | Kim et al.,                     | g et al.,         |                  | Gysel et al.,     |
| $\kappa$           | 2020)                                           | 2021)                            | 2020)                           | 2021)             | n/a <sup>b</sup> | 2007)             |

60 <sup>a</sup> Aerosol Refractive Index Archive from <http://eodg.atm.ox.ac.uk/ARIA/> based on Cotterell et  
 61 al. (Cotterell et al., 2017) and Query (Query, 1985); <sup>b</sup>  $k_{OA}$  is determined in the study.

62

63 Table S2. The mean and standard deviation of aerosol hygroscopicity related parameters.

|                 | 2016      |           | 2018      |           |
|-----------------|-----------|-----------|-----------|-----------|
|                 | >2 km     | <2 km     | >2 km     | <2 km     |
| $f(80\%)$       | 1.41±0.18 | 1.51±0.23 | 1.38±0.15 | 1.50±0.15 |
| $\kappa_{(RH)}$ | 0.22±0.07 | 0.23±0.09 | 0.18±0.07 | 0.21±0.06 |
| $\kappa_{OA}$   | 0.11±0.09 | 0.14±0.11 | 0.10±0.06 | 0.15±0.05 |
| SO4(%)          | 10.0±2.9  | 19.7±9.3  | 13.3±3.7  | 18.9±5.4  |
| OA(%)           | 67.5±5.9  | 60.1±9.6  | 65.7±4.0  | 51.6±9.2  |
| Age (d)         | 7.2±2.6   | 8.6±1.8   | 6.3±1.2   | 9.3±1.4   |
| $f_{44}$        | 0.21±0.03 | 0.22±0.03 | 0.21±0.02 | 0.24±0.03 |

64

65 Table S3. Parameterization coefficients of  $M(F_o, \kappa_{OA}, BCr)$  and  $\gamma(F_o, \kappa_{OA}=0, BCr)$  in Eq. 4 and 5.66 Columns are the subscripts of parameter  $a$ .  $a_{X5}$  with X of 00 represents  $a_{005}$  ( $i=0, j=0, k=5$ ) used

67 in Eq. 5.

| Subscript | $a_{X5}$ | $a_{X4}$ | $a_{X3}$ | $a_{X2}$ | $a_{X1}$ | $a_{X0}$ |
|-----------|----------|----------|----------|----------|----------|----------|
| X         |          |          |          |          |          |          |
| 00        | 2.42     | -7.59    | 8.79     | -3.94    | -0.12    | 0.45     |
| 01        | -0.22    | 0.74     | -0.94    | 0.53     | -0.10    | -0.01    |
| 02        | 0.16     | -0.53    | 0.63     | -0.31    | 0.03     | 0.01     |
| 10        | -2.98    | 9.13     | -10.06   | 3.64     | 1.16     | -0.89    |

---

|    |       |        |        |        |       |       |
|----|-------|--------|--------|--------|-------|-------|
| 11 | 4.03  | -13.97 | 18.31  | -10.10 | 1.05  | 0.67  |
| 12 | -1.83 | 5.90   | -6.98  | 3.36   | -0.29 | -0.17 |
| 20 | 0.46  | -1.20  | 0.81   | 0.59   | -1.11 | 0.45  |
| 21 | -3.19 | 11.23  | -14.94 | 8.25   | -0.70 | -0.65 |
| 22 | 1.26  | -4.07  | 4.80   | -2.25  | 0.12  | 0.14  |
| 0  | 0.83  | -3.13  | 4.44   | -2.66  | -0.14 | 0.67  |
| 1  | 0.61  | -1.94  | 2.56   | -1.90  | 1.33  | -0.66 |
| 2  | -1.25 | 4.48   | -6.31  | 4.21   | -1.13 | -0.00 |

---

68

69

$M(Fo, \kappa_{OA}, BCr)$

$$= [Fo^2 \quad Fo \quad 1] \left[ \begin{array}{l} [\kappa_{OA}^2 \quad \kappa_{OA} \quad 1] \left( \begin{array}{l} [a_{225} \quad a_{224} \quad a_{223} \quad a_{222} \quad a_{221} \quad a_{220}] \\ [a_{215} \quad a_{214} \quad a_{213} \quad a_{212} \quad a_{211} \quad a_{210}] \\ [a_{205} \quad a_{204} \quad a_{203} \quad a_{202} \quad a_{201} \quad a_{200}] \end{array} \begin{array}{l} BCr^5 \\ BCr^4 \\ BCr^3 \\ BCr^2 \\ BCr \\ 1 \end{array} \right) \\ [\kappa_{OA}^2 \quad \kappa_{OA} \quad 1] \left( \begin{array}{l} [a_{125} \quad a_{124} \quad a_{123} \quad a_{122} \quad a_{121} \quad a_{120}] \\ [a_{115} \quad a_{114} \quad a_{113} \quad a_{112} \quad a_{111} \quad a_{110}] \\ [a_{105} \quad a_{104} \quad a_{103} \quad a_{102} \quad a_{101} \quad a_{100}] \end{array} \begin{array}{l} BCr^5 \\ BCr^4 \\ BCr^3 \\ BCr^2 \\ BCr \\ 1 \end{array} \right) \\ [\kappa_{OA}^2 \quad \kappa_{OA} \quad 1] \left( \begin{array}{l} [a_{025} \quad a_{024} \quad a_{023} \quad a_{022} \quad a_{021} \quad a_{020}] \\ [a_{015} \quad a_{014} \quad a_{013} \quad a_{012} \quad a_{011} \quad a_{010}] \\ [a_{005} \quad a_{004} \quad a_{003} \quad a_{002} \quad a_{001} \quad a_{000}] \end{array} \begin{array}{l} BCr^5 \\ BCr^4 \\ BCr^3 \\ BCr^2 \\ BCr \\ 1 \end{array} \right) \end{array} \right] \quad (S1)$$

$$\gamma(Fo, \kappa_{OA} = 0, BCr) = [Fo^2 \quad Fo \quad 1] \begin{pmatrix} [a_{25} & a_{24} & a_{23} & a_{22} & a_{21} & a_{20}] \\ [a_{15} & a_{14} & a_{13} & a_{12} & a_{11} & a_{10}] \\ [a_{05} & a_{04} & a_{03} & a_{02} & a_{01} & a_{00}] \end{pmatrix} \begin{bmatrix} BCr^5 \\ BCr^4 \\ BCr^3 \\ BCr^2 \\ BCr \\ 1 \end{bmatrix} \quad (S2)$$

70

71

## 72 **References**

73 Alfarra, M. R., Paulsen, D., Gysel, M., Garforth, A. A., Dommen, J., Prévôt, A. S. H., Worsnop,  
 74 D. R., Baltensperger, U., and Coe, H.: A mass spectrometric study of secondary organic aerosols  
 75 formed from the photooxidation of anthropogenic and biogenic precursors in a reaction chamber,  
 76 *Atmospheric Chem. Phys.*, 6, 5279–5293, <https://doi.org/10.5194/acp-6-5279-2006>, 2006.

77 Bond, T. C. and Bergstrom, R. W.: Light Absorption by Carbonaceous Particles: An  
 78 Investigative Review, *Aerosol Sci. Technol.*, 40, 27–67,  
 79 <https://doi.org/10.1080/02786820500421521>, 2006.

80 Cotterell, M. I., Willoughby, R. E., Bzdek, B. R., Orr-Ewing, A. J., and Reid, J. P.: A complete  
 81 parameterisation of the relative humidity and wavelength dependence of the refractive index of  
 82 hygroscopic inorganic aerosol particles, *Atmospheric Chem. Phys.*, 17, 9837–9851,  
 83 <https://doi.org/10.5194/acp-17-9837-2017>, 2017.

84 Feng, Y., Ramanathan, V., and Kotamarthi, V. R.: Brown carbon: a significant atmospheric  
 85 absorber of solar radiation?, *Atmospheric Chem. Phys.*, 13, 8607–8621,  
 86 <https://doi.org/10.5194/acp-13-8607-2013>, 2013.

87 Gysel, M., Crosier, J., Topping, D. O., Whitehead, J. D., Bower, K. N., Cubison, M. J., Williams,  
 88 P. I., Flynn, M. J., McFiggans, G. B., and Coe, H.: Closure study between chemical composition



89 and hygroscopic growth of aerosol particles during TORCH2, *Atmospheric Chem. Phys.*, 7,  
90 6131–6144, <https://doi.org/10.5194/acp-7-6131-2007>, 2007.

91 Hussein, T., Puustinen, A., Aalto, P. P., Mäkelä, J. M., Hämeri, K., and Kulmala, M.: Urban  
92 aerosol number size distributions, *Atmospheric Chem. Phys.*, 4, 391–411,  
93 <https://doi.org/10.5194/acp-4-391-2004>, 2004.

94 Kim, N., Yum, S. S., Park, M., Park, J. S., Shin, H. J., and Ahn, J. Y.: Hygroscopicity of urban  
95 aerosols and its link to size-resolved chemical composition during spring and summer in Seoul,  
96 Korea, *Atmospheric Chem. Phys.*, 20, 11245–11262, [https://doi.org/10.5194/acp-20-11245-](https://doi.org/10.5194/acp-20-11245-2020)  
97 2020, 2020.

98 Kuang, Y., Huang, S., Xue, B., Luo, B., Song, Q., Chen, W., Hu, W., Li, W., Zhao, P., Cai, M.,  
99 Peng, Y., Qi, J., Li, T., Wang, S., Chen, D., Yue, D., Yuan, B., and Shao, M.: Contrasting effects  
100 of secondary organic aerosol formations on organic aerosol hygroscopicity, *Atmospheric Chem.*  
101 *Phys.*, 21, 10375–10391, <https://doi.org/10.5194/acp-21-10375-2021>, 2021.

102 Lide, D. R. (Ed.): *CRC Handbook of Chemistry and Physics*, 89th Edition, 89th edition., CRC  
103 Press, Boca Raton, 2736 pp., 2008.

104 Liu, D., Whitehead, J., Alfarra, M. R., Reyes-Villegas, E., Spracklen, D. V., Reddington, C. L.,  
105 Kong, S., Williams, P. I., Ting, Y.-C., Haslett, S., Taylor, J. W., Flynn, M. J., Morgan, W. T.,  
106 McFiggans, G., Coe, H., and Allan, J. D.: Black-carbon absorption enhancement in the  
107 atmosphere determined by particle mixing state, *Nat. Geosci.*, 10, 184–188,  
108 <https://doi.org/10.1038/ngeo2901>, 2017.

109 Liu, D., Li, S., Hu, D., Kong, S., Cheng, Y., Wu, Y., Ding, S., Hu, K., Zheng, S., Yan, Q.,  
110 Zheng, H., Zhao, D., Tian, P., Ye, J., Huang, M., and Ding, D.: Evolution of Aerosol Optical  
111 Properties from Wood Smoke in Real Atmosphere Influenced by Burning Phase and Solar  
112 Radiation, *Environ. Sci. Technol.*, 55, 5677–5688, <https://doi.org/10.1021/acs.est.0c07569>, 2021.

113 Query, M. R.: Optical Constants, US Army Chem. Res., Aberdeen Proving Ground, 418, 1985.

114 Shen, X. J., Sun, J. Y., Zhang, X. Y., Zhang, Y. M., Zhang, L., Che, H. C., Ma, Q. L., Yu, X. M.,  
115 Yue, Y., and Zhang, Y. W.: Characterization of submicron aerosols and effect on visibility  
116 during a severe haze-fog episode in Yangtze River Delta, China, *Atmos. Environ.*, 120, 307–316,  
117 <https://doi.org/10.1016/j.atmosenv.2015.09.011>, 2015.

118 Topping, D. O., McFiggans, G. B., and Coe, H.: A curved multi-component aerosol  
119 hygroscopicity model framework: Part 1 – Inorganic compounds, *Atmospheric Chem. Phys.*, 5,  
120 1205–1222, <https://doi.org/10.5194/acp-5-1205-2005>, 2005.

121
